# Supplementary material
Source: PubMed Central journal article supplement (PMC6999292)
Supplement: ELSC-17-226-s001.pdf [file ELSC-17-226-s001.pdf]

Newly isolated yeasts from Tunisian microhabitats: Lipid accumulation and fatty acid composition

Fatma AROUS, Samia AZABOU, Irene-Eva TRIANTAPHYLLIDOU, George AGGELIS, Atef JAOUANI, Moncef NASRI, Tahar MECHICHI

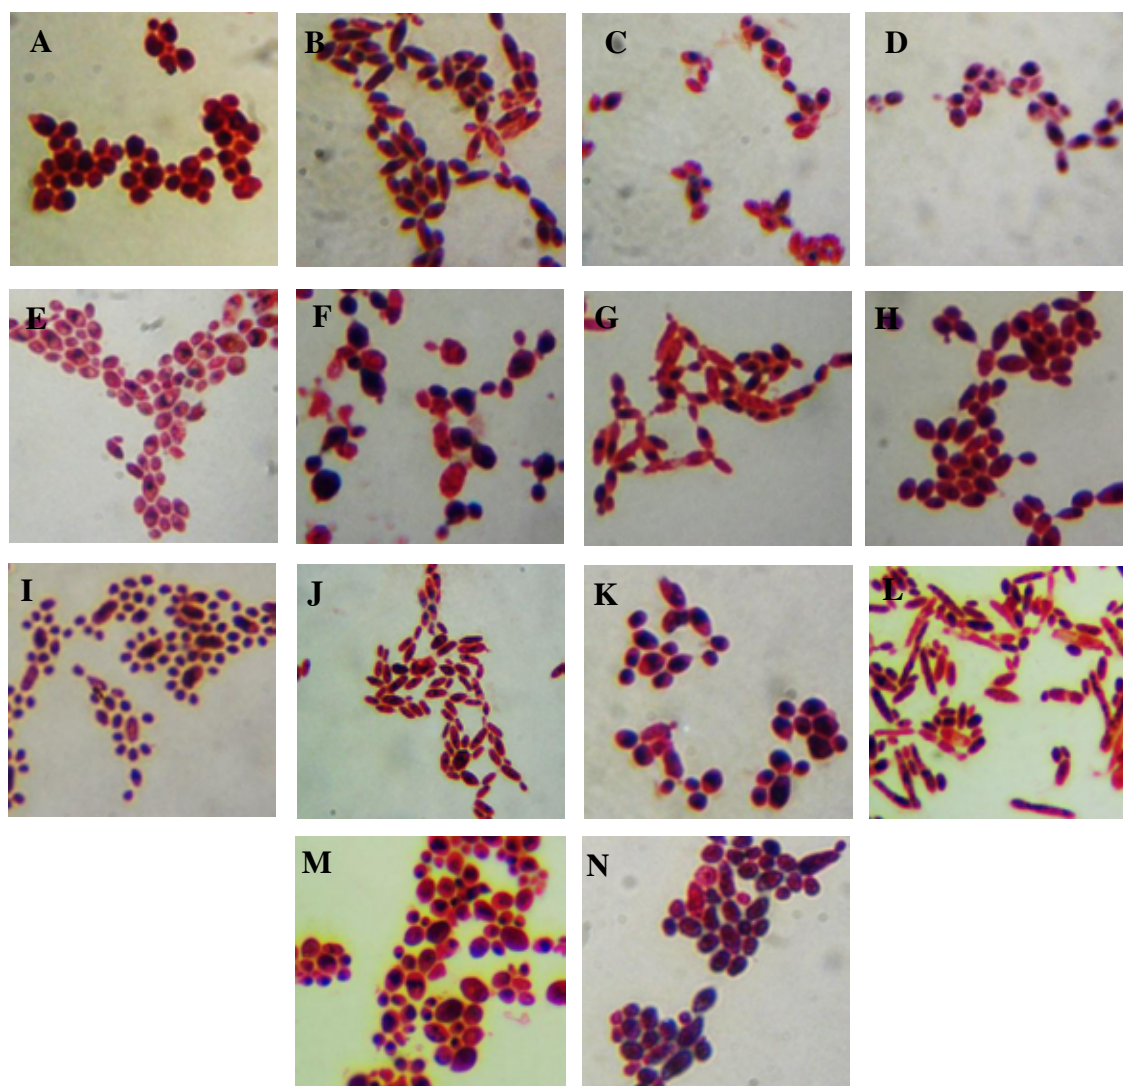

Figure S1

Optical microscopy pictures (x1000) of yeast cells stained with Sudan Black B. Lipid bodies appeared as black particuls within the cells. (A) strain BM1, (B) strain M3, (C) strain M31, (D) strain O2, (E) strain LC1R, (F) strain EC28, (G) strain EP2, (H) strain V6, (I) strain BM24, (J) strain M1, (K) strain LV2, (L) strain EL1, (M) strain EL2, (N) strain CC1.
